# Supplementary material
Source: MDPI journal article supplement (https://www.mdpi.com/1424-2818/11/2/24)
Supplement: s1 [file s1]

# Mitochondrial genomes from New Zealand's extinct adzebills (Aves: Aptornithidae: *Aptornis*) support a sister-taxon relationship with the Afro-Madagascan Sarothruridae

## Supplementary Figures

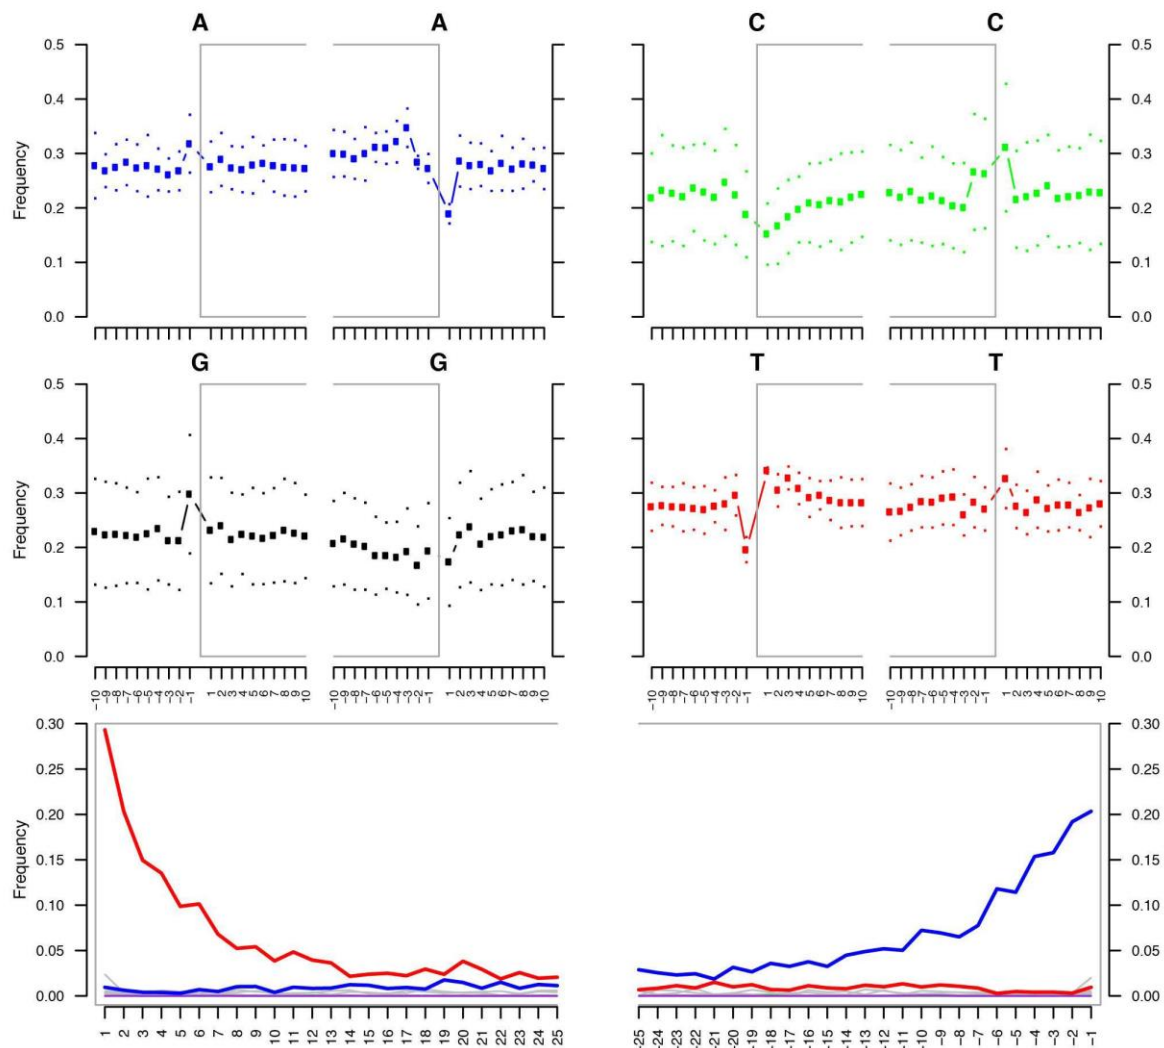

**Figure S1:** MapDamage report for the final round of mapping reads from DM8046 against the DM8046 majority-rule consensus. The top panels show the characteristic high frequency of purines (A and G) immediately before the reads. The two lower panels show the accumulation of 5' C-to-T (red) and 3' G-to-A (blue) misincorporations characteristic of ancient DNA.

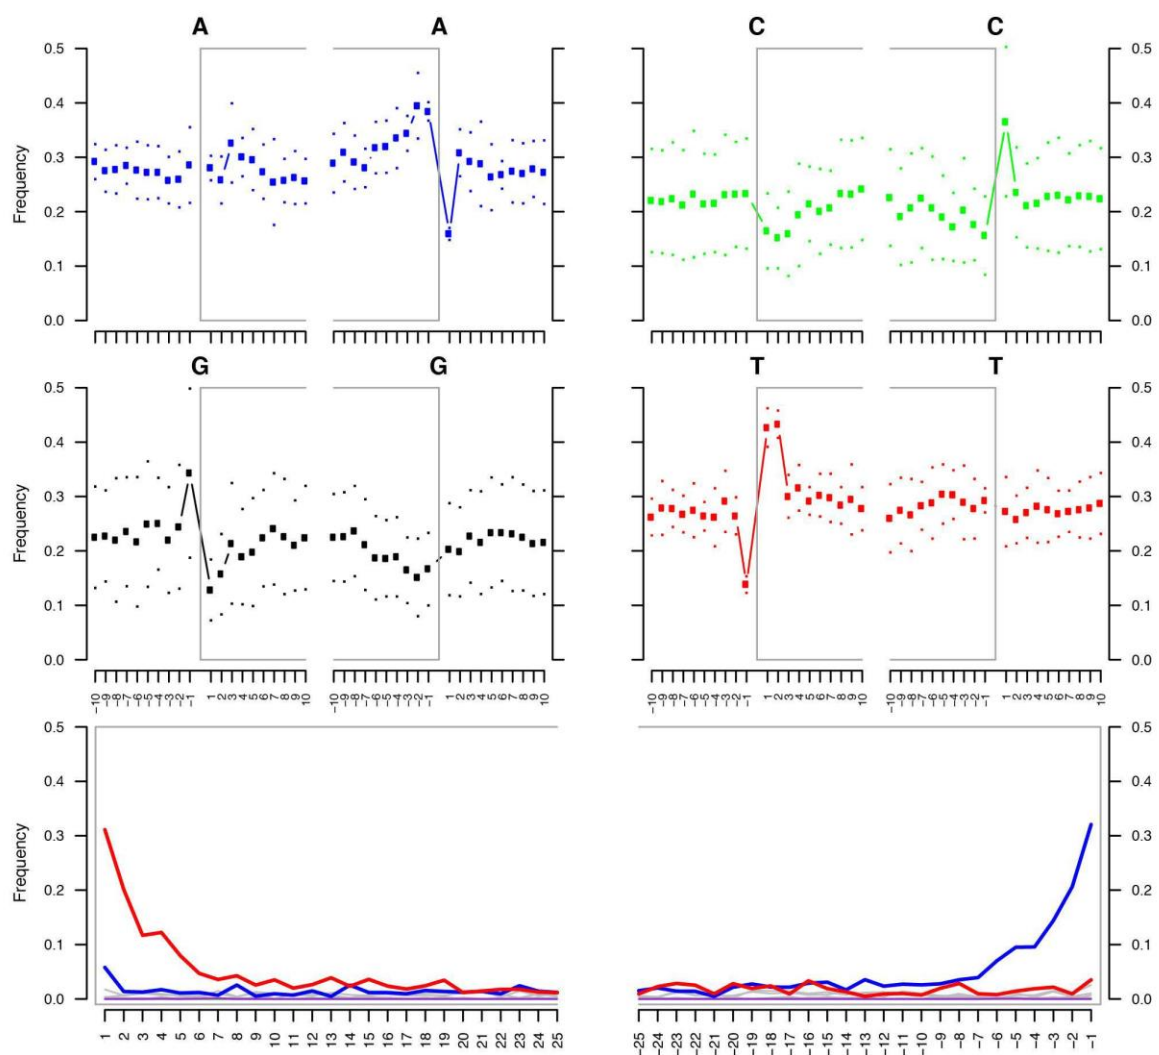

**Figure S2:** MapDamage report for the final round of mapping reads from S23033 against the DM8046 majority-rule consensus. The top panels show the characteristic high frequency of purines (A and G) immediately before the reads. The two lower panels show the accumulation of 5' C-to-T (red) and 3' G-to-A (blue) misincorporations characteristic of ancient DNA.

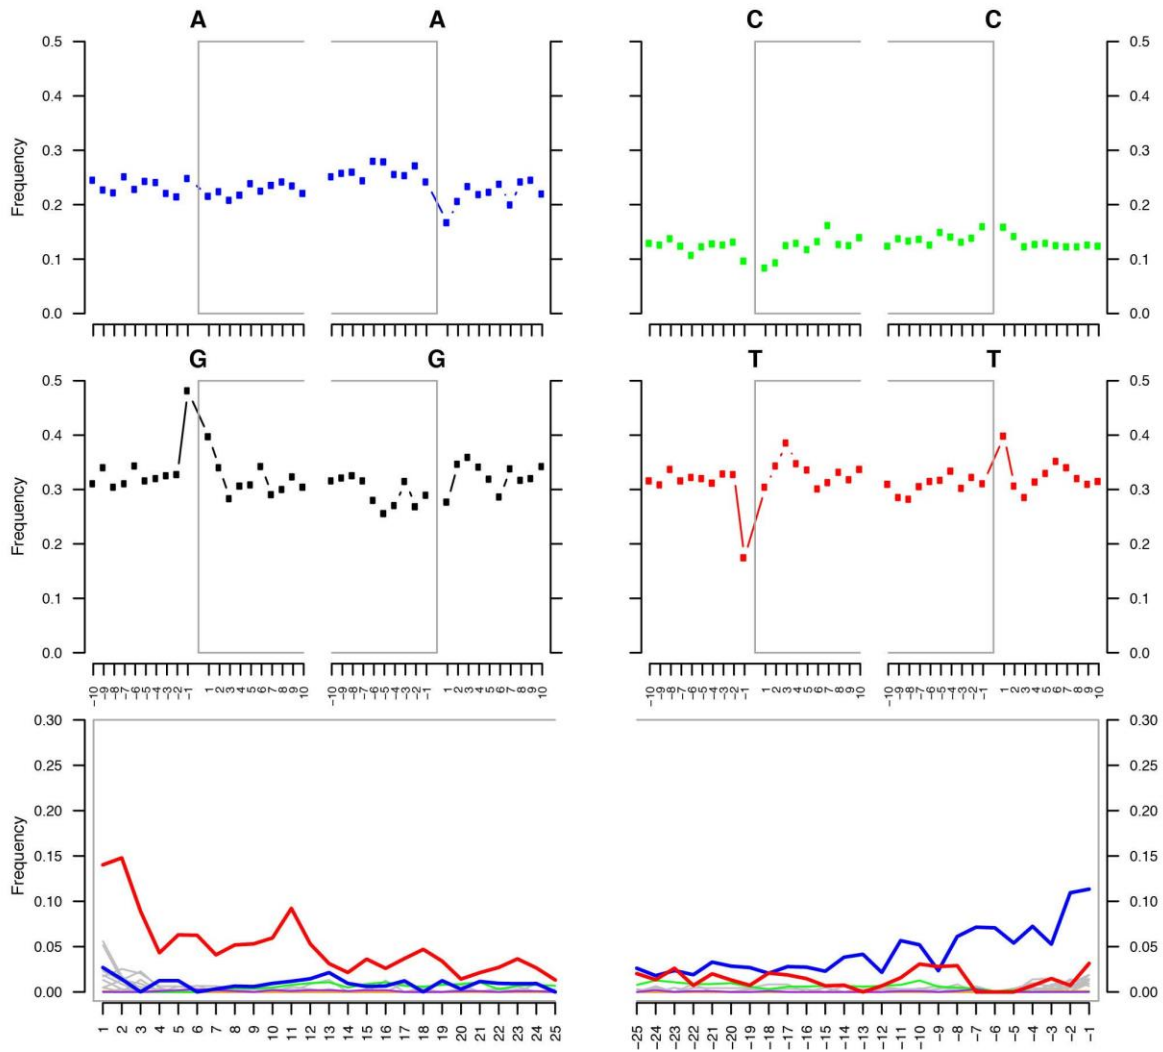

**Figure S3:** MapDamage report for the final round of mapping reads from CM AV.18536 against the DM8046 majority-rule consensus. The top panels show the characteristic high frequency of purines (A and G) immediately before the reads. The two lower panels show the accumulation of 5' C-to-T (red) and 3' G-to-A (blue) misincorporations characteristic of ancient DNA.

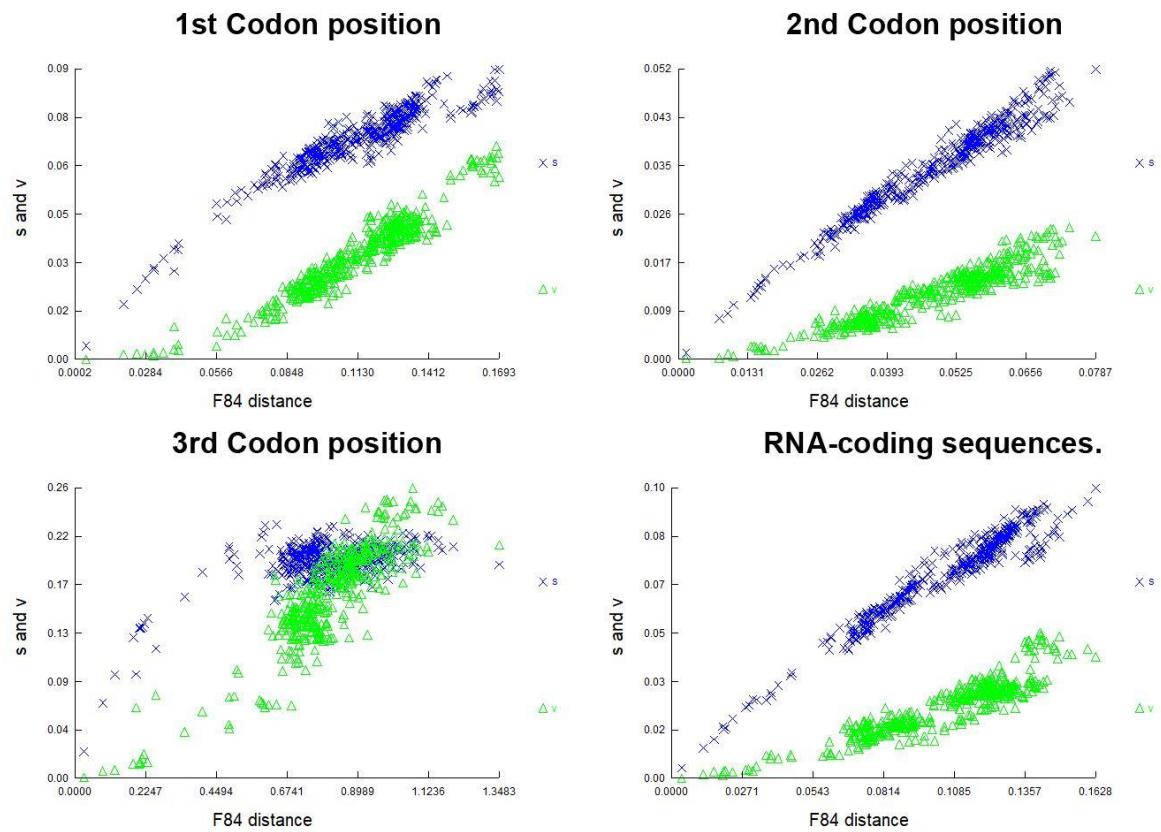

**Figure S4:** Saturation plots of the primary alignment (predominantly complete mitochondrial genomes) generated using DAMBE. Blue points represent transitions (s), green points represent transversions (v).
